# Supplementary material
Source: publisher site journal article supplement (https://neobiota.pensoft.net/article/82636/download/suppl/37/)
Supplement: Supplementary file 1

# Plankton hitch-hikers on naturalist's instruments as silent intruders of aquatic ecosystems: current risks and possible prevention

Łukasz Wejnerowski <sup>1</sup>, Tümer Orhun Aykut <sup>2</sup>, Aleksandra Pełechata <sup>1</sup>, Michał Rybak <sup>3</sup>, Tamara Dulić <sup>4</sup>, Jussi Meriluoto <sup>4</sup>, Marcin Krzysztof Dziuba <sup>5</sup>

<sup>1</sup> Department of Hydrobiology, Institute of Environmental Biology, Faculty of Biology, Adam Mickiewicz University, Poznań, Poland <sup>2</sup> Department of Biology, Institute of Science, Istanbul University, Istanbul, Turkey <sup>3</sup> Department of Water Protection, Institute of Environmental Biology, Faculty of Biology, Adam Mickiewicz University, Poznań, Poland <sup>4</sup> Biochemistry, Faculty of Science and Engineering, Åbo Akademi University, Turku, Finland <sup>5</sup> Department of Ecology and Evolutionary Biology, University of Michigan, Ann Arbor, USA

Corresponding author: Łukasz Wejnerowski ([wejner@amu.edu.pl](mailto:wejner@amu.edu.pl))

## Supplementary Material 7

**Concentration of ammonium ( $\text{NH}_4^+$ ), nitrate ( $\text{NO}_3^-$ ), orthophosphates ( $\text{PO}_4^{3-}$ ) in the Kierskie lake filtrates (Resident(-), Resident(+)) at endpoint of the second experiment**

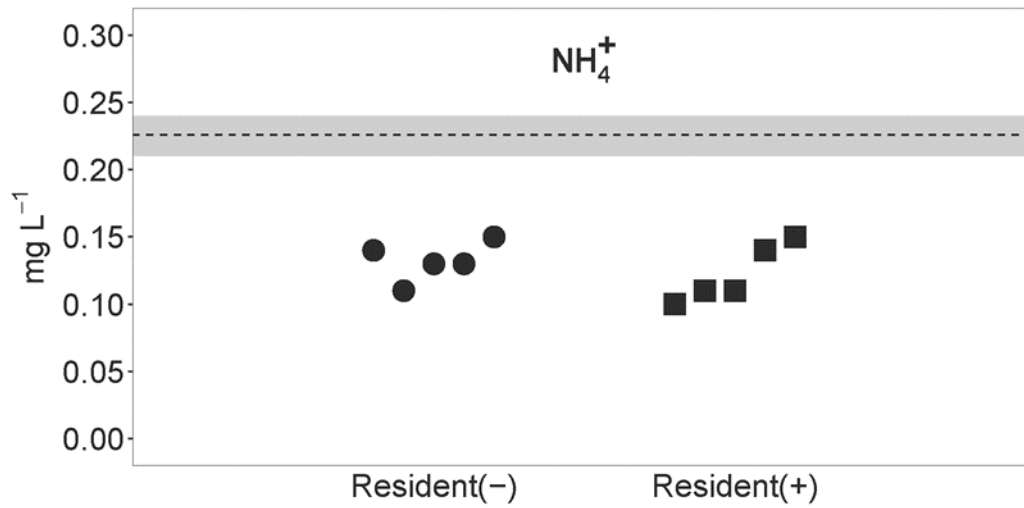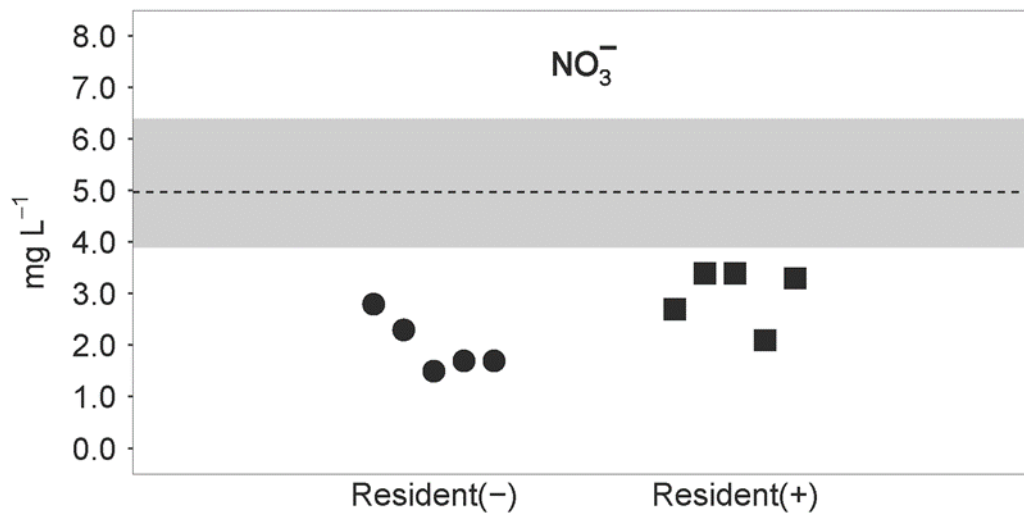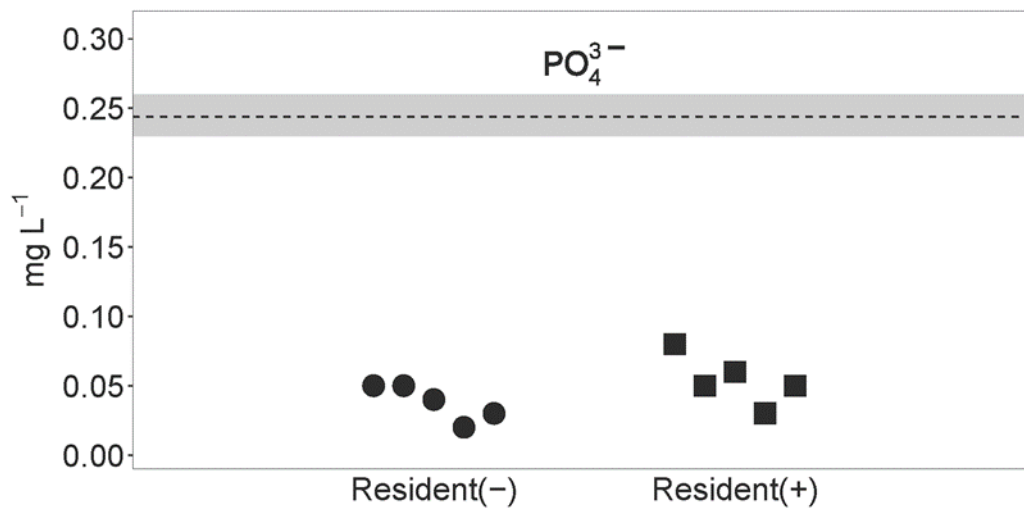

\* The horizontal dashed line and grey area indicate the mean and range (max-min) in the concentration of nutrient at the startpoint of the experiment (estimation based on five replicates).
